# Supplementary material
Source: bioRxiv or medRxiv preprint supplement (http://medrxiv.org/highwire/filestream/83248/field_highwire_adjunct_files/0/2020.05.27.20114363-1.pdf)
Supplement: Supplementary file [file 2020.05.27.20114363-1.pdf]

**Additional file 3: Table S2: Detailed histological findings in all patients.**

| ID | Lung                                                                                                                                                    | Other Organs                                                                                                                                                                                                                                                                                                                                                                                                                                                                                                                                                                                                                                                                                                                                                                                                                                                                                                                                                                                                       |
|----|---------------------------------------------------------------------------------------------------------------------------------------------------------|--------------------------------------------------------------------------------------------------------------------------------------------------------------------------------------------------------------------------------------------------------------------------------------------------------------------------------------------------------------------------------------------------------------------------------------------------------------------------------------------------------------------------------------------------------------------------------------------------------------------------------------------------------------------------------------------------------------------------------------------------------------------------------------------------------------------------------------------------------------------------------------------------------------------------------------------------------------------------------------------------------------------|
| 1  | Bilateral lesions of E-DAD<br>Microthrombosis<br>Acute broncho-pneumonia (RIL, ML)<br>Acute pneumonia (LIL)<br>Atypical pneumocytes                     | <p><b>Cardiovascular system:</b><br/>                     Cardiomegaly<br/>                     Ischemic cardiomyopathy<br/>                     Fibrosis<br/>                     Atheromatosis</p> <p><b>Gastro-intestinal system:</b><br/>                     Congestive hepatopathy<br/>                     Esophagitis<br/>                     Chronic gastritis</p> <p><b>Urinary system:</b><br/>                     Acute tubular injury (ATI) with severe autolysis<br/>                     Hemosiderin granules in tubular epithelium<br/>                     Pigmented casts<br/>                     Arteriosclerosis<br/>                     Discrete chronic cystitis</p> <p><b>CNS:</b><br/>                     Craniotomy for subdural hematoma drainage<br/>                     Cerebral hemorrhage<br/>                     Focal necrosis<br/>                     Edema<br/>                     Focal spongiosis</p> <p><b>Bone Marrow:</b><br/>                     Hyperplasia</p> |
| 2  | Bilateral lesions of E-DAD<br>Bilateral lesions of L-DAD<br>Microthrombosis<br>Emphysema<br>Focal lympho-plasmocytic infiltrate<br>Atypical pneumocytes | <p><b>Cardiovascular system:</b><br/>                     Cardiomegaly<br/>                     Ischemic cardiomyopathy<br/>                     Fibrosis<br/>                     Atheromatosis</p> <p><b>Gastrointestinal system:</b><br/>                     Congestive hepatopathy<br/>                     Esophagitis</p> <p><b>Urinary system:</b><br/>                     Acute tubular injury (ATI) with severe autolysis<br/>                     Pigmented casts<br/>                     Severe arteriosclerosis</p> <p><b>Bone Marrow:</b><br/>                     Hyperplasia</p>                                                                                                                                                                                                                                                                                                                                                                                                                 |
| 3  | E-DAD (L)<br>Microthrombosis<br>Emphysema<br>Left pneumonectomy                                                                                         | <p><b>Cardiovascular system:</b><br/>                     Cardiomegaly<br/>                     Ischemic cardiomyopathy<br/>                     Chronic pericarditis</p>                                                                                                                                                                                                                                                                                                                                                                                                                                                                                                                                                                                                                                                                                                                                                                                                                                          |

|   |                                                                                                                                          |                                                                                                                                                                                                                                                                                                                                                                                                                                                                                                                                                                                                                                                                                                |
|---|------------------------------------------------------------------------------------------------------------------------------------------|------------------------------------------------------------------------------------------------------------------------------------------------------------------------------------------------------------------------------------------------------------------------------------------------------------------------------------------------------------------------------------------------------------------------------------------------------------------------------------------------------------------------------------------------------------------------------------------------------------------------------------------------------------------------------------------------|
|   |                                                                                                                                          | <p>Atheromatosis</p> <p><b>Gastrointestinal system:</b><br/> Congestive hepatopathy<br/> Esophagitis</p> <p><b>Urinary system:</b><br/> Acute tubular injury (ATI) with severe autolysis<br/> Hemosiderin granules in tubular epithelium<br/> Pigmented casts<br/> Severe arteriosclerosis<br/> Chronic cystitis</p> <p><b>CNS:</b><br/> Vascular congestion<br/> Extravasation of erythrocytes into the surrounding<br/> Virchow-Robin spaces<br/> Hemosiderin-laden macrophages<br/> Spongiosis (also observed in brainstem)</p> <p><b>Bone marrow:</b><br/> Hyperplasia with dysplastic megakaryocyte</p>                                                                                   |
| 4 | <p>Bilateral lesions of E-DAD<br/> Microthrombosis<br/> Emphysema<br/> Focal lympho-plasmocytic infiltrate<br/> Atypical pneumocytes</p> | <p><b>Cardiovascular system:</b><br/> Ischemic cardiomyopathy<br/> Pericardial effusion<br/> Atheromatosis</p> <p><b>Gastrointestinal system:</b><br/> Ascites<br/> Esophagitis<br/> Peri-pancreatic steato-necrosis<br/> Right adrenal carcinoma</p> <p><b>Urinary system:</b><br/> Acute tubular injury (ATI) with severe autolysis<br/> Hemosiderin granules in tubular epithelium<br/> Pigmented casts<br/> Arteriosclerosis</p> <p><b>CNS:</b><br/> Brain cortical ischemic lesion with meningeal<br/> thickening associated to hemosiderin-laden<br/> macrophages<br/> Cerebral hemorrhage<br/> Spongiosis</p> <p><b>Bone marrow:</b><br/> Hyperplasia with dysplastic megakaryocyte</p> |
| 5 | <p>Bilateral lesions of E-DAD<br/> L-DAD (RSL, LSL)<br/> Microthrombosis<br/> Acute broncho-pneumonia (RSL)</p>                          | <p><b>Cardiovascular system:</b><br/> Cardiomegaly<br/> Ischemic cardiomyopathy<br/> Pericardial effusion</p>                                                                                                                                                                                                                                                                                                                                                                                                                                                                                                                                                                                  |

|   |                                                                                                                                                                                                                                       |                                                                                                                                                                                                                                                                                                                                                                                                                                                                                                                                                                            |
|---|---------------------------------------------------------------------------------------------------------------------------------------------------------------------------------------------------------------------------------------|----------------------------------------------------------------------------------------------------------------------------------------------------------------------------------------------------------------------------------------------------------------------------------------------------------------------------------------------------------------------------------------------------------------------------------------------------------------------------------------------------------------------------------------------------------------------------|
|   | <p>Lung infarct (RIL)<br/>Right bilobectomy (RIL-ML)</p>                                                                                                                                                                              | <p>Atheromatosis</p> <p><b>Gastrointestinal system:</b><br/>Hepatomegaly<br/>Hepatic steatosis (40%)<br/>Cholestasis<br/>Macroscopic and microscopic ischemic enteritis associated with microthrombi</p> <p><b>Urinary system:</b><br/>ATI not assessable due to severe autolysis<br/>Hemorrhagic cystitis</p> <p><b>CNS:</b><br/>Edema<br/>Hemorrhagic suffusion<br/>Spongiosis (also located to brainstem and centrum ovale)</p> <p><b>Bone marrow:</b><br/>Hyperplasia with dysplastic megakaryocyte</p>                                                                |
| 6 | <p>Bilateral lesions of E-DAD<br/>Bilateral lesions of L-DAD<br/>Microthrombosis<br/>Invasive aspergillosis (lung and trachea)<br/>Acute broncho-pneumonia (LIL)<br/>Acute pneumonia (LIL, ML, RSL, RIL)<br/>Atypical pneumocytes</p> | <p><b>Cardiovascular system:</b><br/>Recent coronary stent<br/>Cardiomegaly<br/>Ischemic cardiomyopathy<br/>Fibrosis<br/>Severe atheromatosis<br/>Abdominal aortic aneurysm</p> <p><b>Gastrointestinal system:</b><br/>Hepatomegaly<br/>Hepatic steatosis (&lt;5%)<br/>Esophagitis with few multinucleated giant cells<br/>Gastric congestion</p> <p><b>Urinary system:</b><br/>ATI not assessable due to severe autolysis<br/>Hemosiderin granules in tubular epithelium<br/>Pigmented casts<br/>Moderate arteriosclerosis</p> <p><b>Bone marrow:</b><br/>Hyperplasia</p> |
| 7 | <p>Bilateral lesions of E-DAD<br/>L-DAD (LSL)<br/>Bilateral invasive aspergillosis<br/>Acute broncho-pneumonia (RIL)<br/>Acute pneumonia (RIL,ML)<br/>Inhalation pneumonia<br/>Lung infarct (LIL)</p>                                 | <p><b>Cardiovascular system:</b><br/>Ischemic cardiomyopathy</p> <p><b>Gastrointestinal system:</b><br/>Hepatic steatosis (50%)<br/>Esophagitis<br/>Gastric congestion<br/>Splenic white pulp hypoplasia</p>                                                                                                                                                                                                                                                                                                                                                               |

|   |                                                                                                                                                         |                                                                                                                                                                                                                                                                                                                                                                                                                                                                                                                                                                                                                                                                                                                                                                                        |
|---|---------------------------------------------------------------------------------------------------------------------------------------------------------|----------------------------------------------------------------------------------------------------------------------------------------------------------------------------------------------------------------------------------------------------------------------------------------------------------------------------------------------------------------------------------------------------------------------------------------------------------------------------------------------------------------------------------------------------------------------------------------------------------------------------------------------------------------------------------------------------------------------------------------------------------------------------------------|
|   |                                                                                                                                                         | <p><b>Urinary system:</b><br/> ATI not assessable due to severe autolysis<br/> Hemosiderin granules in tubular epithelium<br/> Pigmented casts<br/> Discrete arteriosclerosis</p>                                                                                                                                                                                                                                                                                                                                                                                                                                                                                                                                                                                                      |
| 8 | <p>Bilateral lesions of E-DAD<br/> Acute pneumonia (RSL)<br/> Advanced interstitial fibrosis<br/> Pulmonary hypertension pneumopathy<br/> Emphysema</p> | <p><b>Cardiovascular system:</b><br/> Recent coronary stent<br/> Ischemic cardiomyopathy<br/> Severe atheromatosis</p> <p><b>Gastrointestinal system:</b><br/> Congestive hepatopathy<br/> Esophagitis<br/> Gastric congestion<br/> Colic sevelamer crystals<br/> Chronic pancreatitis</p> <p><b>Urinary system:</b><br/> ATI not assessable due to severe autolysis<br/> Thrombus in an interlobar artery<br/> Hemosiderin granules in tubular epithelium<br/> Pigmented casts<br/> Diabetic nephropathy<br/> Severe chronic pyelonephritis<br/> Calcium oxalate crystal deposits<br/> Severe arteriosclerosis<br/> Chronic cystitis</p> <p><b>CNS:</b><br/> Edema<br/> Focal necrosis<br/> Spongiosis</p> <p><b>Bone marrow:</b><br/> Hyperplasia with dysplastic megakaryocytes</p> |
| 9 | <p>Bilateral lesions of E-DAD<br/> L-DAD (ML)<br/> Microthrombosis<br/> Lung infarct<br/> Inhalation pneumonia</p>                                      | <p><b>Cardiovascular system:</b><br/> Cardiomegaly<br/> Ischemic cardiomyopathy<br/> Fibrosis<br/> Discrete atheromatosis</p> <p><b>Gastrointestinal system:</b><br/> Hepatic steatosis (&lt;5%)<br/> Kayexalate crystals in the esophagus, stomach and colon<br/> Adrenal cortical adenoma</p> <p><b>Urinary system:</b><br/> ATI not assessable due to severe autolysis<br/> Hemosiderin granules in tubular epithelium<br/> Pigmented casts</p>                                                                                                                                                                                                                                                                                                                                     |

|    |                                                                                                                                                     |                                                                                                                                                                                                                                                                                                                                                                                                                                                                                                                                                               |
|----|-----------------------------------------------------------------------------------------------------------------------------------------------------|---------------------------------------------------------------------------------------------------------------------------------------------------------------------------------------------------------------------------------------------------------------------------------------------------------------------------------------------------------------------------------------------------------------------------------------------------------------------------------------------------------------------------------------------------------------|
|    |                                                                                                                                                     | <p>Chronic interstitial inflammation<br/>Severe arteriosclerosis<br/>Hemorrhagic cystitis</p> <p><b>CNS:</b><br/>Edema<br/>Focal necrosis<br/>Hemorrhagic suffusion<br/>Spongiosis (located to brain and brainstem)</p> <p><b>Bone marrow:</b><br/>Hyperplasia with dysplastic megakaryocyte</p>                                                                                                                                                                                                                                                              |
| 10 | <p>Bilateral lesions of E-DAD<br/>L-DAD (L)<br/>Microthrombosis<br/>Hyperplasia of pneumocytes type-II<br/>Syncytial multinucleated giant cells</p> | <p><b>Cardiovascular system:</b><br/>Cardiomegaly<br/>Ischemic cardiomyopathy</p> <p><b>Gastrointestinal system:</b><br/>Hepatomegaly, congestive hepatopathy<br/>Hepatic steatosis &lt;5%<br/>Chronic hepatitis<br/>Kayexalate crystals in the stomach and colon</p> <p><b>Urinary system:</b><br/>ATI not assessable due to severe autolysis<br/>Calcium deposits in the medulla<br/>Severe arteriosclerosis</p> <p><b>CNS:</b><br/>Hemorrhagic suffusion<br/>Spongiosis</p>                                                                                |
| 11 | <p>Bilateral lesions of E-DAD<br/>Hyperplasia of pneumocytes type-II<br/>Syncytial multinucleated giant cells</p>                                   | <p><b>Cardiovascular system:</b><br/>Cardiomegaly<br/>Ischemic cardiomyopathy</p> <p><b>Gastrointestinal system:</b><br/>Liver cirrhosis<br/>Hepatic steatosis &lt;5%<br/>Microsphere bead for hepatocarcinoma<br/>Esophagitis</p> <p><b>Urinary system:</b><br/>ATI not assessable due to severe autolysis<br/>Diabetic nephropathy<br/>Discrete glomerulosclerosis<br/>Chronic pyelonephritis<br/>Pigmented casts<br/>Calcium deposits in medulla<br/>Moderate arteriosclerosis<br/>Prostatic adenocarcinoma</p> <p><b>Bone Marrow:</b><br/>Hyperplasia</p> |

|    |                                                                                                                                                                                                                                           |                                                                                                                                                                                                                                                                                                                                                                                                                                                                                                                                                                                                                                                                                                                                                         |
|----|-------------------------------------------------------------------------------------------------------------------------------------------------------------------------------------------------------------------------------------------|---------------------------------------------------------------------------------------------------------------------------------------------------------------------------------------------------------------------------------------------------------------------------------------------------------------------------------------------------------------------------------------------------------------------------------------------------------------------------------------------------------------------------------------------------------------------------------------------------------------------------------------------------------------------------------------------------------------------------------------------------------|
| 12 | <p>Bilateral lesions of E-DAD<br/> L-DAD (L)<br/> Microthrombosis<br/> Pulmonary embolism (RIL)<br/> Bronchitis (LIL, ML)<br/> Acute pneumonia (LSL, RIL)<br/> Acute broncho-pneumonia (ML)<br/> Syncytial multinucleated giant cells</p> | <p><b>Cardiovascular system:</b><br/> Cardiomegaly<br/> Ischemic cardiomyopathy</p> <p><b>Gastrointestinal system:</b><br/> Hepatomegaly<br/> Hepatic steatosis (5%)<br/> Esophagitis<br/> Kayexalate crystals in the esophagus, stomach and colon</p> <p><b>Urinary system:</b><br/> ATI not assessable due to severe autolysis<br/> Hemosiderin granules in tubular epithelium<br/> Pigmented casts<br/> Discrete glomerulosclerosis<br/> Chronic pyelonephritis<br/> Moderate arteriosclerosis<br/> Subacute cystitis.</p> <p><b>CNS:</b><br/> Hemorrhagic suffusion<br/> Spongiosis<br/> Extravasation of erythrocytes into the surrounding Virchow-Robin spaces<br/> Hemosiderin-laden macrophages</p> <p><b>Bone Marrow:</b><br/> Hyperplasia</p> |
| 13 | <p>Bilateral lesions of E-DAD<br/> Perivascular chronic inflammatory infiltrate<br/> Acute broncho-pneumonia (LIL)</p>                                                                                                                    | <p><b>Cardiovascular system:</b><br/> Cardiomegaly<br/> Ischemic cardiomyopathy<br/> Fibrosis</p> <p><b>Gastrointestinal system:</b><br/> Liver cirrhosis<br/> Chronic hepatitis<br/> Hepatic steatosis (5%)<br/> Barrett's esophagus<br/> Discrete gastritis</p> <p><b>Urinary system:</b><br/> ATI not assessable due to severe autolysis<br/> Moderate glomerulosclerosis<br/> Chronic pyelonephritis<br/> Discrete arteriosclerosis.<br/> Follicular cystitis</p> <p><b>Bone Marrow:</b><br/> Hyperplasia (predominantly myeloid)</p>                                                                                                                                                                                                               |
| 14 | <p>Bilateral alveolar edema<br/> Bilateral aspiration pneumonia</p>                                                                                                                                                                       | <p><b>Cardiovascular system:</b><br/> Cardiomegaly</p>                                                                                                                                                                                                                                                                                                                                                                                                                                                                                                                                                                                                                                                                                                  |

|    |                                                                                                                         |                                                                                                                                                                                                                                                                                                                                                                                                                                                                                                                                                                          |
|----|-------------------------------------------------------------------------------------------------------------------------|--------------------------------------------------------------------------------------------------------------------------------------------------------------------------------------------------------------------------------------------------------------------------------------------------------------------------------------------------------------------------------------------------------------------------------------------------------------------------------------------------------------------------------------------------------------------------|
|    | Perivascular chronic inflammatory infiltrate                                                                            | <p>Ischemic cardiomyopathy</p> <p><b>Gastrointestinal system:</b><br/>Congestive hepatopathy<br/>Esophagitis</p> <p><b>Urinary system:</b><br/>ATI not assessable due to autolysis<br/>Hyaline arteriosclerosis<br/>Angiomyolipoma (2mm)</p> <p><b>Bone Marrow:</b><br/>Hyperplasia</p>                                                                                                                                                                                                                                                                                  |
| 15 | <p>Bilateral E-DAD<br/>L-DAD (L)<br/>Microthrombosis<br/>Lung infarct (RIL, LIL ,RSL,ML)<br/>Pulmonary embolism (L)</p> | <p><b>Cardiovascular system:</b><br/>Cardiomegaly<br/>Recent myocardial infarction</p> <p><b>Gastrointestinal system:</b><br/>Hepatomegaly<br/>Hepatic steatosis (10%)<br/>Esophagitis<br/>Gastritis</p> <p><b>Urinary system:</b><br/>ATI not assessable due to severe autolysis<br/>Pigmented casts<br/>Discrete arteriosclerosis.<br/>Acute mycotic cystitis<br/>Vascular thrombi into the bladder</p> <p><b>CNS:</b><br/>Hemorrhagic suffusion<br/>Hemosiderin-laden macrophages<br/>Extravasation of erythrocytes into the surrounding<br/>Virchow-Robin spaces</p> |
| 16 | <p>Bilateral E-DAD<br/>L-DAD (L)<br/>Microthrombosis<br/>Hyperplasia of pneumocytes type-II</p>                         | <p><b>Cardiovascular system:</b><br/>Cardiomegaly<br/>Recent myocardial infarction</p> <p><b>Gastrointestinal system:</b><br/>Hepatic steatosis (5%)<br/>Centro-lobular hepatic necrosis<br/>Esophagitis<br/>Gastritis</p> <p><b>Kidneys and urinary system:</b><br/>ATI not assessable due to severe autolysis<br/>Hemosiderin granules in tubular epithelium<br/>Pigmented casts<br/>Moderate glomerulosclerosis<br/>Moderate arteriosclerosis<br/>Subacute cystitis</p>                                                                                               |

|    |                                                                                                                                         |                                                                                                                                                                                                                                                                                                                                                                                                                                                                                                                                                                                      |
|----|-----------------------------------------------------------------------------------------------------------------------------------------|--------------------------------------------------------------------------------------------------------------------------------------------------------------------------------------------------------------------------------------------------------------------------------------------------------------------------------------------------------------------------------------------------------------------------------------------------------------------------------------------------------------------------------------------------------------------------------------|
|    |                                                                                                                                         | <p><b>CNS:</b><br/>Spongiosis<br/>Extravasation of erythrocytes into the surrounding Virchow-Robin spaces<br/>Hemosiderin-laden macrophages<br/>Edema</p> <p><b>Bone Marrow:</b><br/>Hyperplasia</p> <p><b>Others:</b><br/>Thyroid follicular carcinoma</p>                                                                                                                                                                                                                                                                                                                          |
| 17 | <p>Bilateral hemorrhage (post-thoracotomy)<br/>Embolization right bronchial artery<br/>L-DAD<br/>Acute broncho-pneumonia (LSL; LIL)</p> | <p><b>Cardiovascular system:</b><br/>Cardiomegaly<br/>Ischemic cardiomyopathy</p> <p><b>Gastrointestinal system, liver:</b><br/>Congestive hepatopathy<br/>Chronic hepatitis (C-virus)<br/>Esophagitis<br/>Gastritis<br/>Acute pancreatitis</p> <p><b>Urinary system:</b><br/>Acquired cystic kidney disease (ACKD)<br/>Multiple tubular adenomas in native kidneys<br/>ATI not assessable due to severe autolysis in kidney transplant</p> <p><b>CNS:</b><br/>Spongiosis<br/>Hemorrhagic suffusion<br/>Hemosiderin-laden macrophages</p> <p><b>Bone Marrow:</b><br/>Hyperplasia</p> |

E-DAD: Diffuse alveolar damage early phase, L-DAD: Diffuse alveolar damage late phase, R: right lung, L: left lung, RSL: right superior lobe, ML: right middle lobe, RIL: right superior lobe, LSL: left superior lobe, LIL: left inferior lobe, ATI: acute tubular injury; CNS: central nervous system
